# Supplementary material for: Immunogenicity Differences of the ChAdOx1 nCoV-19 Vaccine According to Pre-Existing Adenovirus Immunity
Source: MDPI journal article supplement (doi:10.3390/vaccines11040784), 2023-04-01
Supplement: s1 [file s1]

**Supplemental Table S1.** Reactogenicity to the second dose of ChAdOx1 nCoV-19 vaccine according to pre-existing Adenovirus immunity.

|                               | Total<br>(n = 67) | Adenovirus immunity         |                              | <i>p</i> value |
|-------------------------------|-------------------|-----------------------------|------------------------------|----------------|
|                               |                   | Negative<br>(n = 19, 28.4%) | Positive†<br>(n = 48, 71.6%) |                |
| Use of antipyretic medication | 33 (49.3%)        | 9 (47.4%)                   | 24 (50.0%)                   | 0.846          |
| Rash                          | 4 (6.0%)          | 1 (5.3%)                    | 3 (6.3%)                     | 0.999          |
| Edema                         | 3 (4.5%)          | 1 (5.3%)                    | 2 (4.2%)                     | 0.999          |
| Headache                      | 10 (14.9%)        | 5 (26.3%)                   | 5 (10.4%)                    | 0.132          |
| Fatigue                       | 24 (35.8%)        | 4 (21.1%)                   | 20 (41.7%)                   | 0.113          |
| Chills                        | 5 (7.5%)          | 1 (5.3%)                    | 4 (8.3%)                     | 0.999          |
| Myalgia                       | 10 (14.9%)        | 4 (21.1%)                   | 6 (12.5%)                    | 0.452          |
| Arthralgia                    | 1 (1.5%)          | 0 (0.0%)                    | 1 (2.1%)                     | 0.999          |
| Fever                         | 3 (4.5%)          | 1 (5.3%)                    | 2 (4.2%)                     | 0.999          |

\*Solicited local and systemic adverse reactions are self-reported over 7 days after each dose.

\*Reactogenicity severity is reported on a scale of 0–4: 0, none; 1, mild; 2, moderate; 3, severe; and 4, very severe.

†One patient with pre-existing Adenovirus immunity is not self-reported solicited local and systemic adverse reactions.
